1                    **Optimizing systemic insecticide use to improve malaria control**

2                    By Hannah R. Meredith<sup>1\*</sup>, Luis Furuya-Kanamori<sup>2</sup>, and Laith Yakob<sup>1</sup>

3

4                    <sup>1</sup> Department of Disease Control, Faculty of Infectious and Tropical Diseases, London  
5                    School of Hygiene and Tropical Medicine, London, United Kingdom

6                    <sup>2</sup> Research School of Population Health, College of Health and Medicine, Australian  
7                    National University, Canberra, Australia

8                    \* corresponding author: [hmeredi4@jhu.edu](mailto:hmeredi4@jhu.edu)

## 9 **Abstract**

10 Long lasting insecticidal nets and indoor residual sprays have significantly reduced  
11 the burden of malaria. However, several hurdles remain before elimination can be achieved:  
12 mosquito vectors have developed resistance to public health insecticides, including  
13 pyrethroids, and have altered their biting behaviour to avoid these indoor control tools.  
14 Systemic insecticides, drugs applied directly to blood-hosts to kill mosquitoes that take a  
15 blood meal, offer a promising vector control option. To date, most studies focus on  
16 repurposing ivermectin, a drug used extensively to treat river blindness. There is concern that  
17 over-dependence on a single drug will inevitably repeat past experiences with the rapid  
18 spread of pyrethroid resistance in malaria vectors. Diversifying the arsenal of systemic  
19 insecticides used for mass drug administration would improve this strategy's sustainability.  
20 Here, a review was conducted to identify systemic insecticide candidates and consolidate  
21 their pharmacokinetic/pharmacodynamic properties. The impact of alternative integrated  
22 vector control options and different dosing regimens on malaria transmission reduction are  
23 illustrated through a mathematical model simulation. The review identified drugs from four  
24 classes commonly used in livestock and companion animals: avermectins, milbemycins,  
25 isoxazolines, and spinosyns. Simulations predicted that isoxazoline and spinosyn drugs were  
26 promising candidates for mass drug administration, as they were predicted to need less  
27 frequent application than avermectins and milbemycins to maintain mosquitocidal blood  
28 concentrations. These findings will provide a guide for investigating and applying different  
29 systemic insecticides to achieve better mosquito control strategies.

30

31 **Keywords:** systemic insecticide, malaria, mosquito, vector control, computational modelling

32 **Significance:**

33           The widespread use of long lasting insecticidal nets (LLINs) and indoor residual spray  
34 has selected for mosquitoes that are resistant to pyrethroids or avoid exposure by feeding  
35 outdoors or on livestock. Systemic insecticides, drugs that render a host's blood toxic to  
36 feeding mosquitoes, could be an effective control strategy for mosquitoes with pyrethroid  
37 resistance and/or outdoor feeding tendencies. Here, a number of existing systemic insecticide  
38 candidates are identified and their pharmacokinetic properties in different drug-host-route  
39 scenarios consolidated. These data were used to parameterise a mathematical model that  
40 illustrated the projected gains achievable in malaria control programmes already employing  
41 LLINs. The findings provide a guide for investigating and applying different systemic  
42 insecticides to improve mosquito control strategies and reduce malaria transmission.

43 **Introduction:**

44           Long lasting insecticidal nets (LLINs) and indoor residual sprays (IRS) have played  
45 significant roles in reducing the burden of malaria (1, 2). However, several hurdles remain  
46 before elimination can be achieved. First, pyrethroids are heavily used in LLINs and,  
47 previously, IRS (3). As a result, the widespread and sustained use of this single class of  
48 insecticides has selected for mosquitoes that are resistant to the primary intervention methods  
49 (4, 5). Second, because LLINs and IRS target mosquitoes that feed indoors on humans,  
50 mosquitoes have shifted their feeding patterns to avoid exposure. For instance, increasing  
51 numbers of mosquitoes have been found to seek their bloodmeals and/or rest outdoors after a  
52 new instalment of bed nets (6). Some malaria-transmitting mosquitoes avoid indoor  
53 interventions by obtaining their blood meals from animal hosts (7). Though livestock cannot  
54 act as parasite reservoirs, bites diverted away from human hosts can act as temporary reprieve

55 from insecticide exposure, increasing vector lifespans, and consequently contributing to  
56 perpetuated transmission (8).

57 To build on recent gains in malaria vector control, it is critical to develop a method  
58 that is effective against pyrethroid resistant, outdoor feeding/resting, or zoophagic mosquitoes  
59 (9). A promising solution is systemic insecticides, drugs that render host blood toxic to a  
60 mosquito that takes a blood meal (10). The types of systemic insecticides most relevant to  
61 treating mosquitoes are ectoparasiticides, drugs that target ectoparasites (e.g. blood-feeding  
62 arthropods), and endectocides, drugs that target both endo- and ectoparasites. Many of these  
63 drugs have a mode of action distinct from pyrethroids (11–15), and thus should be effective  
64 against mosquitoes that either have mutations specific to pyrethroids or are susceptible. These  
65 systemic insecticides have been widely used to treat humans, livestock, and domestic animals  
66 for infections ranging from gastrointestinal and systemic nematodes to blood-feeding  
67 parasites (16–19).

68 Studies have demonstrated that mass drug administration (MDA) of the systemic  
69 insecticide ivermectin to humans and cattle can significantly decrease mosquito population  
70 numbers temporarily (20, 21). To attain longer lasting impacts, the optimal use of systemic  
71 insecticides requires understanding the pharmacokinetics of the drug in the host to determine  
72 the dosing frequency necessary for maintaining lethal blood-drug concentrations.  
73 Additionally, understanding the mosquito population's feeding patterns will guide the  
74 decision of whether humans or animal hosts should be targeted. Finally, recent history has  
75 highlighted the importance of avoiding over-reliance on singular control tools; thus, it would  
76 be prudent to both investigate the effects of synergizing the systemic insecticide with extant  
77 interventions and expand the arsenal of effective systemic insecticides from the current  
78 candidate of interest, ivermectin (22, 23). Here, a review of endectocides and  
79 ectoparasiticides is presented to collate the pharmacokinetic properties for different drug-

80 host-route combinations. These data were then used to parameterise a mathematical model to  
81 illustrate the projected gains achievable in malaria control programmes already employing  
82 LLINs.

## 83 **Methods**

### 84 I. Literature review

85 Veterinary and human parasiticides were identified with systemic properties that  
86 affected arthropods and were not prohibited nor being phased out of use in most countries.  
87 These included avermectins, milbemycins, neonicotinoids, spinosyns, and isoxazolines.  
88 Unlike pyrethroids, which target voltage-gated sodium channels (11), avermectins and  
89 milbemycins target glutamate-gated chloride channels (12), neonicotinoids and spinosyns  
90 target unique sites of the nicotinic acetylcholinesterase receptor (nAChR) (13, 14), and  
91 isoxazolines target  $\gamma$ -aminobutyric acid (GABA)-gated chloride channels(15). Further  
92 discussion of the parasiticides' structures and modes of action is beyond the scope of this  
93 study, but may be reviewed elsewhere (12–15).

94 To determine the relevant pharmacokinetic studies for different systemic insecticide  
95 treatments, a review of the electronic literature was conducted. PubMed was searched from  
96 inception to July 24, 2018 using the following search terms: (“*systemic insecticide*” OR  
97 *endectocide* OR *avermectin* OR *abamectin* OR *doramectin* OR *eprinomectin* OR *ivermectin*  
98 OR *selamectin* OR *milbemycin* OR “*milbemycin oxime*” OR *moxidectin*, *ectoparasiticides*  
99 OR *isoxazolines* OR *afoxolaner* OR *fluralaner* OR *sarolaner* OR *lotilaner* OR *neonicotinoids*  
100 OR *imidacloprid* OR *nitenpyram* OR *spinosyns* OR *spinosad* OR *spinetoram* OR “*N-tert-*  
101 *butyl nodulisporamide*”) AND (*pharmacokinetics* OR “*area under the curve*” OR “*area*  
102 *under curve*” OR *kinetics* OR “*half-life*” OR *Cmax* OR *Tmax* OR *blood* OR OR *plasma*). The  
103 complete list of accepted and rejected studies is available upon request to the corresponding  
104 author.

105 Study inclusion was determined in two steps. First, the titles and abstracts were  
106 screened to determine studies that were not relevant, not primary research (e.g., letter or  
107 review), or purely computational. Irrelevant studies were defined as those focusing on drug  
108 mechanism, a drug that was not systemic or ineffective against mosquitoes, or hosts that are  
109 not targeted by mosquitoes for blood meals. After the initial screen, the full papers of the  
110 remaining studies were reviewed. Inclusion required the reporting of relevant  
111 pharmacokinetic parameters in plasma, use of a standardized drug (i.e. generic or a  
112 commercially available formula), application of single drug (i.e. no adjuvants or cocktails),  
113 and a test-population size  $n \geq 3$ .

114 From the selected studies, the following data were extracted directly into an Excel  
115 spreadsheet: host studied, drug applied, drug name/formula, dose applied, route of  
116 administration, the maximum drug concentration reached in the plasma ( $C_{max}$ ), the time it  
117 took to reach  $C_{max}$ , the area under the curve, the half-lives for absorption and elimination, the  
118 mean residual time, and the volume of distribution. All data were summarized using basic  
119 descriptive statistics (mean and standard deviation or standard error when available) for each  
120 scenario (host-drug-route of administration). As different classes of drugs require different  
121 concentrations to achieve the same toxicity level, the doses for each combination of drug-  
122 host-route were not compared. Instead, the analysis focused on the pharmacokinetic metrics  
123 that impact the treatment's efficacy, which in turn, can be used to calculate the appropriate  
124 dose.

## 125 II. Data analysis

126 To determine the underlying trends between the pharmacokinetic parameters and each  
127 categorical factor (host, drug class, route of administration), a weighted (using the inverse of  
128 the variance) three-way ANOVA was conducted in Stata. Hosts with fewer than 10

129 observations were grouped into two categories based on bodyweight: other-small (< 75 kg)  
 130 and other-large (> 75 kg).

### 131 III. Model development

132 To investigate strategies for applying different systemic insecticides to further limit  
 133 malaria transmission, models from the literature were modified (24–26) (see **Supplementary**  
 134 **Text** for model development and **Table S1** for parameter values). The proportion of bites that  
 135 lead to infection, egg laying rate, and death rate of mosquitoes are dependent on the  
 136 concentration of insecticide in LLINs ( $N$ ) and systemic insecticides in livestock or humans  
 137 ( $D_L$  or  $D_H$ , respectively) a mosquito is exposed to. Different host species and routes of  
 138 administration are characterised by different rates of adsorption, which were often not  
 139 reported. Hence, to allow for comparison, the model represented the systemic insecticide's  
 140 pharmacokinetics as a single compartment and the initial insecticide concentration as the  
 141 reported  $C_{max}$  in the blood after treatment.

$$142 \quad \frac{dD_L}{dt} = -k_{D_L} D_L \quad (1)$$

$$143 \quad \frac{dD_H}{dt} = -k_{D_H} D_H \quad (2)$$

$$144 \quad \frac{dN}{dt} = -k_N N \quad (3)$$

$$145 \quad b_h = a b \left( 1 - C_N \frac{N^{H_n}}{N^{H_n} + LC_{50N} [T_N]^{H_n}} \right) \quad (4)$$

$$146 \quad b_m = a c \left( 1 - C_N \frac{N^{H_n}}{N^{H_n} + LC_{50N} [T_N]^{H_n}} \right) \quad (5)$$

$$147 \quad \beta_{mc} = \beta_m + \frac{1}{3} \left( \begin{array}{l} (1 - p_h) C_L \frac{D_L^{H_b}}{D_L^{H_b} + F_{50}^{H_b}} + \\ p_h C_H \frac{D_H^{H_b}}{D_H^{H_b} + F_{50}^{H_b}} \end{array} \right) \beta_m \quad (6)$$

$$148 \quad \mu_{mc} = \mu_m + \frac{1}{3} \left( \begin{array}{l} p_h C_N \frac{N^{H_n}}{N^{H_n} + LC_{50N}[T_N]^{H_n}} \mu_N + \\ (1 - p_h) C_L \frac{D_L^{H_d}}{D_L^{H_d} + LC_{50D}[T_D]^{H_d}} \mu_I + \\ p_h C_H \frac{D_H^{H_d}}{D_H^{H_d} + LC_{50D}[T_D]^{H_d}} \mu_I \end{array} \right) \quad (7)$$

149 The impact of insecticides used for livestock treatment, human treatment, and bed net  
 150 treatment is diminished as they degrade at rates  $k_{D_L}$ ,  $k_{D_H}$ , and  $k_N$ . These rates were  
 151 determined by the half-lives recorded from the review. The transmission potential from  
 152 vector to human or vice versa ( $b_h$  and  $b_m$ , respectively) is a function of biting frequency ( $a$ ),  
 153 the proportion of bites that successfully leads to infection in humans or mosquitoes ( $b$  and  $c$ ,  
 154 respectively), the coverage of bed nets ( $C_N$ ) and whether the LLIN's insecticidal  
 155 concentration is above the lethal concentration for killing 50% of the population in a set  
 156 amount of time ( $LC_{50N}[T_N]$ ). Mosquitoes lay eggs at a natural rate of  $\beta_m$ , but the number of  
 157 eggs laid can be modified with the introduction of certain systemic insecticides ( $\beta_{mc}$ ).  
 158 Similarly, mosquitoes natural death rate ( $\mu_m$ ) is modified with the introduction of LLINs and  
 159 systemic insecticides ( $\mu_{mc}$ ). For both the egg laying rate and death rate, the impact of  
 160 different control strategies depends on the proportion of bites on humans ( $p_H$ ), the coverage  
 161 of LLINs and systemic insecticides in livestock or humans ( $C_N$ ,  $C_L$ ,  $C_H$ , respectively), and the  
 162 respective concentration thresholds for reducing fecundity or killing by 50% ( $F_{50}$ ,  $LC_{50N}[T_N]$ ,  
 163 and  $LC_{50D}[T_D]$ ).

164 The relationship between mosquito fecundity or mortality and the concentration of  
 165 LLINs or systemic insecticides is not linear, but is captured by Hill kinetics. The  $F_{50}$ ,  
 166  $LC_{50D}[T_D]$ , and Hill coefficients ( $H_b$  and  $H_d$  for birth and death rates, respectively) were  
 167 calculated for lab-reared *Anopheles* for different systemic insecticides by fitting a Hill  
 168 equation to published data (27–29) (**Fig. S1-2**). The  $LC_{50N}[T_N]$  was calculated for wild  
 169 *Anopheles* that displayed a range of resistance to LLINs and the Hill coefficient ( $H_n$ ) was



170 calculated for lab-reared, permethrin resistant *Anopheles* by fitting a Hill equation to  
171 published data (30, 31). The time window ( $T_N$  or  $T_D$ ) associated with each insecticide's  
172  $LC_{50}$  was based on previously reported measurements (27–29, 31).

#### 173 IV. Simulations

174 This model was used to explore the impact of synergizing different systemic  
175 insecticide treatments and LLINs on permethrin resistant mosquitoes. A new LLIN was  
176 replaced every three years, as recommended by the WHO (32). Systemic insecticide  
177 treatments were designed to test a range of half-lives (0.1:100 days), dose concentrations  
178 ( $1:10^5$  ng/mL),  $F_{50S}$  (0:480 ng/mL), and  $LC_{50D}[T_D]$ s (7:1180 ng/mL), based on data mined  
179 from the review. The simulation begins with the initial concentration of drug in the host's  
180 blood, approximated by  $C_{max}$ . The appropriate dose necessary to achieve  $C_{max}$  can be  
181 calculated based on pharmacokinetics associated with each host species, as previously  
182 documented (33), and is not discussed here. Although many of the systemic insecticides  
183 identified in the review remain to be characterised as mosquitocidal candidates,  $LC_{50D}[T_D]$ s  
184 were identified from the avermectin, moxidectin, isoxazoline and spinosyn classes for  
185 *Anopheles gambiae* or *An. arabiensis* and used to establish a range of realistic values.  $F_{50S}$   
186 were only reported for a subset of avermectins and moxidectin. Each treatment characterised  
187 by half-life,  $C_{max}$ ,  $F_{50S}$ , and  $LC_{50D}[T_D]$  was dosed at frequencies ranging from weekly to  
188 annually. Strategy outcome was quantified by calculating the relative reduction (RR) in  
189 malaria prevalence after 3 years of drug treatment and LLIN coverage ( $M_{N+D}$ ) relative to 3  
190 years of LLINs alone ( $M_N$ ).

$$191 \quad \text{Relative reduction} = \frac{M_N - M_{N+D}}{M_N} \times 100 \quad (8)$$

192 This framework was applied to evaluate strategies for areas with different levels of baseline  
193 malaria, mosquito populations with different feeding behaviours, and different deployment  
194 scenarios (targeting livestock only, humans only, or both).

## 195 **Results**

### 196 I. Data retrieval

197 From the initial 375 articles returned by the search, 237 full-text articles were  
198 assessed for eligibility, and 139 met the eligibility criteria (**Fig. 1a**). The studies reported  
199 pharmacokinetic parameters in eight different host categories, ten systemic insecticides, and  
200 six routes of administration (**Fig. 1b-d**). The three most commonly studied hosts were cattle,  
201 sheep, and dogs. Systemic insecticides studied included five avermectins (abamectin,  
202 doramectin, eprinomectin, ivermectin, and selamectin), three isoxazolines (afoxaloner,  
203 fluralaner, and lotilaner), one milbemycin (moxidectin), and one spinosyn (spinosad). These  
204 insecticides were applied intramuscularly, intraruminally, intravenously, orally,  
205 subcutaneously, or topically. Note that intraruminal and intravenous routes of administration  
206 are experimental and are not currently operationally feasible; however, they were included to  
207 help determine the full range of action possible for each drug.

### 208 II. Data analysis

209 To evaluate the different treatment scenarios (host, route of administration, and drugs  
210 grouped by class), weighted three-way ANOVAs were conducted for each pharmacokinetic  
211 parameter. Half-life of elimination and  $C_{\max}$  were the only parameters with significant  
212 interactions ( $p < 0.05$ ) with host, route, and drug. The significant effectors of half-life were  
213 drug class ( $p = 0.016$ ), route of admission ( $p = 0.007$ ), and interactions between host and  
214 route ( $p < 0.001$ ) and drug and route ( $p = 0.007$ ). Regardless of route of administration, the  
215 order of drugs from shortest to longest half-lives were avermectins < milbemycins <  
216 spinosyns < isoxazolines. The median half-life for avermectins and milbemycins was < 10

217 days for all routes of administration, whereas the isoxazolines half-lives were > 10 days (**Fig.**  
218 **2a, Fig. S3**). Comparing median half-lives for a given drug class across hosts shows some  
219 host-dependency. For instance, the milbemycin had a longer median half-life in dogs (19.4  
220 days) than in other hosts (< 10 days) and avermectins have a longer median half-life in cattle  
221 than in other hosts (**Fig. 2b, Fig. S4**). When comparing routes of administration for different  
222 hosts, topically applied drugs typically achieved longer half-lives than orally applied ones  
223 (**Fig. 2c, Fig. S5**).

224 The significant factors for  $C_{\max}$  were drug ( $p = 0.03$ ) and interactions between host  
225 and drug ( $p = 0.002$ ) and host and route ( $p < 0.001$ ). The order of drugs from lowest to  
226 highest  $C_{\max}$  was different from that of half-lives: milbemycins < avermectins < isoxazolines  
227 < spinosyns (**Fig. S6**). Cattle reported the lowest median  $C_{\max}$  for milbemycins, whereas dogs  
228 and sheep had the lowest  $C_{\max}$  for avermectins (**Fig. 2d, Fig. S7**). There was also a  
229 dependency of  $C_{\max}$  on host and route (**Fig. 2e, Fig. S8**). Although the intravenous route  
230 resulted in the highest  $C_{\max}$  for different hosts, due to the drug being directly delivered into  
231 the bloodstream, the order of resulting  $C_{\max}$  for other routes varied based on host.

232 The spread in half-lives and  $C_{\max}$ s seen for a given drug-host-route combination can  
233 be attributed to several host factors that may affect some drugs' absorption and,  
234 consequently, the plasma concentration. These factors include age, gender, breed, diet,  
235 presence of parasite infection, pregnancy, lactation, and whether or not topically treated hosts  
236 are restricted from self-licking (34–41). Understanding how these host conditions affect  
237 basic pharmacokinetics is critical for designing optimal treatment strategies that can account  
238 for these natural variations.

239 III. Basic dynamics of malaria transmission and control methods

240 The model captures the temporal dynamics of malaria transmission in a human  
241 population being exposed to mosquito bites. Upon the introduction of the LLIN, a general  
242 decline in malaria prevalence (the sum of symptomatic and asymptomatic individuals) is  
243 observed, followed by a steady increase as the insecticide in the net degrades and fewer  
244 mosquitoes are killed by LLIN exposure (**Fig. 3a**). The addition of treating a blood host with  
245 systemic insecticide can further reduce malaria prevalence when applied frequently enough.

#### 246 IV. Dosing strategy design and evaluation

247 To quantify the efficacy of different dosing strategies, the relative reduction (RR) in  
248 malaria prevalence after three years of using LLINs and systemic insecticide treated livestock  
249 was compared to that of using LLINs alone. For a set dosing frequency, the RR increased as a  
250 function of half-life and  $C_{\max}$  (**Fig. 3b**).

251 The minimum dosing frequency was calculated to achieve a target RR (here, 10%) for  
252 a range of different drugs distinguished by half-life,  $C_{\max}$ ,  $F_{50}$ , and  $LC_{50D}[T_D]$  (**Fig. 3c-i**). The  
253 drugs with the longest half-lives and highest  $C_{\max}$ s needed to be dosed the least often to  
254 maintain a sufficiently high concentration to remain lethal to feeding mosquitoes. Given the  
255 same half-life and  $C_{\max}$ , drugs with higher  $F_{50}$  and  $LC_{50D}[T_D]$  needed to be dosed more  
256 frequently to compensate for the decreased efficacy of drug on mosquito fecundity or  
257 lethality.

258 Overlaying the data gathered in the review for drugs with reported  $F_{50}$ s and  
259  $LC_{50D}[T_D]$ s for *Anopheles gambiae sensu lato* shows the frequency at which these existing  
260 drugs would need to be applied to achieve the target 10% relative reduction in malaria  
261 prevalence. The avermectins, represented by ivermectin, eprinomectin, and doramectin, have  
262 relatively low  $F_{50}$ s and  $LC_{50D}[T_D]$ s, suggesting that relatively low concentrations of drug in  
263 the bloodstream would affect the fecundity and death rates of feeding mosquitoes. However,

264 this impact is limited by these drugs' relatively short half-lives, ranging from 0.4 to 11.1 days  
265 (**Table 1**). Depending on the host and route of administration, regimens with dosing  
266 frequencies ranging from weekly to quarter-annually would be required to achieve the target  
267 10% relative reduction in malaria prevalence. Although ivermectin and eprinomectin have a  
268 similar  $LC_{50_D}[T_D]$ , ivermectin has a stronger effect on fecundity (**Fig. S2**). Consequently,  
269 ivermectin would require less frequent dosing than eprinomectin to achieve the same target  
270 reduction, given scenarios with the same  $C_{max}$  and half-life. Doramectin has a lower impact  
271 on fecundity and death rates, with higher  $F_{50}$  and  $LC_{50_D}[T_D]$  than ivermectin and  
272 eprinomectin.

273         Although fluralaner and afoxolaner (both isoxazolines) have higher  $LC_{50_D}[T_D]$ s than  
274 ivermectin, they are predicted to achieve 10% RR with yearly dosing, due to their longer  
275 half-life and higher  $C_{max}$ . Similarly, spinosad has a high  $LC_{50_D}[T_D]$ , a relatively long half-life  
276 of 11.3 days, and a much higher  $C_{max}$  of 1550.0 ng/mL, and could achieve a 10% RR when  
277 dosed biannually. These results are conservative, as the effect of fluralaner, afoxolaner, and  
278 spinosad on fecundity are assumed to be zero until this effect has been characterised in  
279 mosquitoes.

280         Despite some of the studies evaluating moxidectin reported the longest half-lives and  
281 highest  $C_{max}$ s, its high  $F_{50}$  and  $LC_{50_D}[T_D]$  means that it would have to be dosed more  
282 frequently (> weekly) or at higher doses to provide an effective complement to LLINs.

## 283 V. Application to different scenarios

284         This method for evaluating dosing strategies for systemic insecticides can be used to  
285 evaluate differences in baseline malaria prevalence in a community, mosquito feeding  
286 behaviour, and coverage scenarios. For each scenario, a prediction was made for the dosing  
287 frequency necessary for scenarios in which livestock, humans, or both are treated with a

288 systemic insecticide similar to ivermectin (**Table 1**). Unless otherwise mentioned, it was  
289 assumed that mosquitoes were indiscriminate feeders, resistant to permethrin, and malaria  
290 was mesoendemic.

291 *i. Malaria endemicity*

292 Control methods for varying levels of malaria endemicity were explored by simulating  
293 mesoendemic and hyperendemic environments (baseline prevalence between 11% and 50%,  
294 or >50%, respectively) (**Fig. 4a-c**) (42). For all levels of endemicity, treating only livestock  
295 or only humans resulted in the same amount of relative reduction for a given half-life and  
296  $C_{\max}$  because the mosquitoes were simulated as indiscriminate feeders. Treating both  
297 livestock and humans had a compounding effect that resulted in the greatest reduction in  
298 malaria prevalence and a down-shift in dosing frequencies for a set half-life and  $C_{\max}$ . With  
299 increasing malaria prevalence, a drug with the same half-life and  $C_{\max}$  would need to be  
300 dosed more frequently to achieve the same relative reduction in malaria. In a low level  
301 mesoendemic environment (malaria prevalence = 25%), LLINs alone play a significant role  
302 in reducing transmission; however, additional treatment of livestock and humans could  
303 further reduce prevalence and theoretically break transmission. In a high level mesoendemic  
304 environment (malaria prevalence = 50%), LLINs alone are not as effective and the additional  
305 treatment of livestock and humans could significantly reduce malaria transmission. When  
306 malaria is hyperendemic (prevalence = 65%), the addition of systemic insecticide treatment  
307 would reduce malaria prevalence relative to LLINs alone; however, to bring malaria  
308 transmission under control, longer, sustained treatment and/or the use of drugs with longer  
309 half-lives and higher  $C_{\max}$  would be necessary.

310 *ii. Mosquito feeding behaviour*

311 Choosing the correct control method for a given community also relies on the  
312 bloodmeal preference of the mosquito population (**Fig. 4d-e**) (43). When mosquitoes are  
313 zoophilic, malaria transmission can largely be controlled by LLINs because the mosquitoes  
314 do not target humans as frequently. Treating livestock with systemic insecticides would be  
315 more effective than treating humans, requiring less frequent dosing for a drug with a given  
316 half-life and  $C_{\max}$ . Malaria in regions with anthropophilic mosquitoes was reduced the most  
317 with the treatment of both livestock and humans, with most of the reduction due to the  
318 treatment of humans. Dosing frequencies were increased, given the need to maintain high  
319 enough lethal systemic insecticide concentrations to affect a greater number of mosquitoes  
320 targeting humans for bloodmeals.

## 321 **Discussion**

322 To date, ivermectin has been the main systemic insecticide considered for its  
323 mosquitocidal properties and the only one marketed for human use (44–46). However, there  
324 are a range of additional avermectins and different drug classes, such as milbemycins,  
325 spinosyns, and isoxazolines, that should be screened as potential candidates for future  
326 mosquito control methods in livestock and/or humans. Here, through the combination of a  
327 review and a malaria transmission model, it was demonstrated how existing systemic  
328 insecticides can be applied to reduce malaria transmission in a range of scenarios. To make a  
329 10% reduction in malaria prevalence beyond what is already achieved by LLINs, some of the  
330 identified drugs need to be applied at frequencies much higher than the current MDA's  
331 annual or bi-annual dosing regimen (19). For instance, it was estimated that many scenarios  
332 using moxidectin would need to be dosed at an unrealistic frequency, faster than once a week,  
333 to reduce malaria transmission. This supports previous studies that show moxidectin has little  
334 impact on mosquitoes (28) and would not be an effective choice for a treatment strategy.  
335 Further investigation of these drugs' safety in hosts and effect on mosquitoes is necessary.

336 To design treatments with an operationally realistic dosing frequency (i.e. once or  
337 twice a year), drugs that naturally attain higher blood concentrations and have longer half-  
338 lives (i.e. isoxazolines and spinosyns) could be selected or alternative ways to achieve higher  
339 concentrations of drug for longer periods of time could be applied. Recently, a study  
340 demonstrated the tolerability of high doses of ivermectin in humans and the resulting increase  
341 in time that the blood was lethal to mosquitoes (47). An alternative to increasing the  
342 concentration of the delivered dose, a number of adjuvants have been reported to improve the  
343 absorption or extend the half-life of systemic insecticides, such as lipids for lipophilic drugs  
344 (48, 49) or efflux pump inhibitors that remove xenobiotics (50–54), respectively. A third  
345 promising solution is the development of sustained-release devices, which have been shown  
346 to maintain a target concentration for 280 days in livestock (55).

347 In addition to designing a dosing regimen that is effective at reducing the transmission  
348 of a vector-borne disease, the secondary effects should also be considered:

#### 349 *Emergence of resistance*

350 As the frequency of insecticide administration is increased to break the malaria  
351 transmission cycle, it is imperative to consider how these new treatment regimens will lead to  
352 the emergence of resistance in mosquitoes as well as other parasites. To gain some insight,  
353 consider how mosquitoes have already developed resistance to the insecticides used in LLINs  
354 and IRS (3). The two main mechanisms of insecticide resistance observed so far in  
355 mosquitoes can be categorized as metabolic or target site mutations (56). Studying how other  
356 arthropods have formed resistance to these systemic insecticides can also shed light on the  
357 path of resistance formation in mosquitoes. For instance, macrocyclic lactone resistance has  
358 been shown to arise in the cattle tick, fruit fly, and body lice due to increased expression of  
359 ATP-binding cassette transporter, P-glycoprotein, and P450 genes (57–59). With strategic use



360 of systemic insecticides that target different mechanisms, monotherapy could be avoided and  
361 the development of resistance in mosquitoes could be delayed.

362         Selecting for resistant off-target parasites is also a concern. One study reported  
363 ivermectin resistant *Rhipicephalus microplus* found on 50% of cattle being treated regularly  
364 with ivermectin for gastrointestinal nematodes (60). Similarly, repeated treatment of  
365 ivermectin for onchocerciasis in humans has selected for resistant *Onchocerca volvulus* in  
366 Ghana (61). As these systemic insecticides are commonly used to control other parasite  
367 infections in humans and livestock, it is critical that dosing regimens and outcome  
368 surveillance addresses the formation of resistance in off-target parasites.

#### 369 *Presence in food products*

370         Considering how different systemic drugs are secreted from a host's system is also a  
371 critical part of evaluating a new treatment program. For instance, lactating hosts treated with  
372 a single-dose of eprinomectin or ivermectin produced milk with detectable drug levels for  
373 weeks, thus exposing the nursing young (62, 63). Due to the unknown effects of the drug on a  
374 newborn, nursing human mothers in the first week after delivery have been excluded from  
375 MDAs of ivermectin (64).

376         Additionally, systemic insecticides from treated hosts becomes incorporated into dairy  
377 and meat products (65). Regulations have been established for levels of acceptable residues  
378 of a few drugs, such as eprinomectin; yet, most other drugs have not been licensed for use in  
379 dairy animals and thus do not have an acceptable limit for drug concentration found in milk  
380 (66). It was surmised that the extent of drug excretion and residence time in milk depends on  
381 a drug's lipophilicity and route of administration (67, 68). However, more studies are needed  
382 to characterise the different drugs' excretion in milk and, subsequently, establish safety limits  
383 for suckling young or consumable items.

384 **Conclusions**

385           Studies have demonstrated that MDAs of systemic insecticides can significantly  
386 decrease mosquito population numbers temporarily. To design effective, long-term vector  
387 control strategies with systemic insecticides, their pharmacokinetics and pharmacodynamics  
388 need to be understood. Here, multiple systemic insecticides with different mechanisms of  
389 action and PK/PD characteristics that could be used in MDAs have been highlighted. The  
390 simulations provide a foundation from which to further characterise how wild mosquitoes  
391 respond to systemic insecticides. Given the history of mosquitoes forming resistance to the  
392 insecticides in LLINs and IRS, having a variety of systemic insecticide strategies that target  
393 different mechanisms could help reduce the rate at which mosquito resistance arises to these  
394 new methods.

395 **Acknowledgements:** HM was funded by the Whitaker International Program. LFK is  
396 supported by an Australian National Health and Medical Research Council Fellowship  
397 (APP1158469).

398 **Competing interests:** The authors declare no competing interests

399 **Figures:**

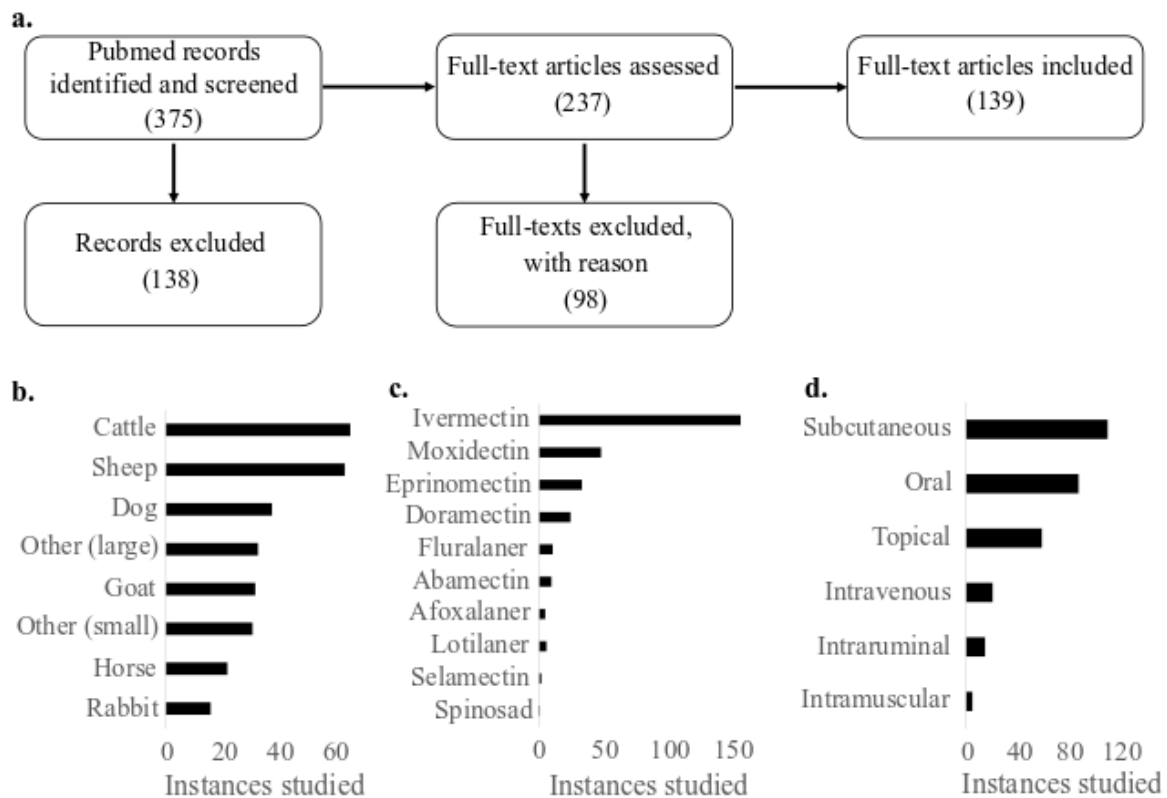

400

401 **Fig. 1.** Identification of existing systemic insecticides' applications. **(a)** A review of PubMed  
402 identified relevant studies of existing systemic insecticides. **(b-d)** The included studies  
403 covered a range of different hosts, systemic insecticides, and routes of administration.

**a. Half-life: Route x Drug**

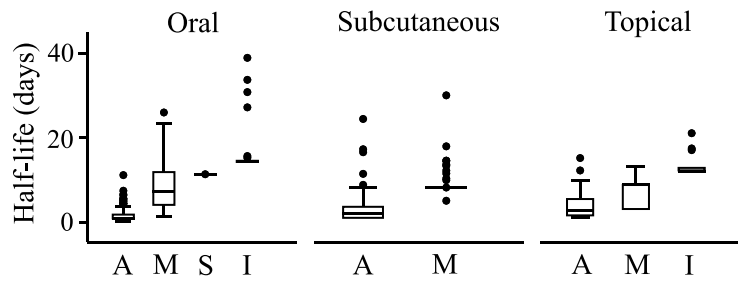

**b. Half-life: Host x Drug**

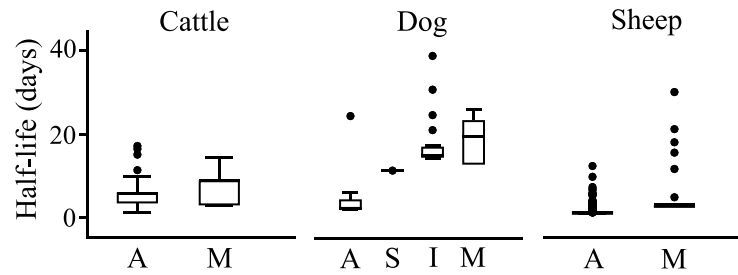

**c. Half-life: Host x Route**

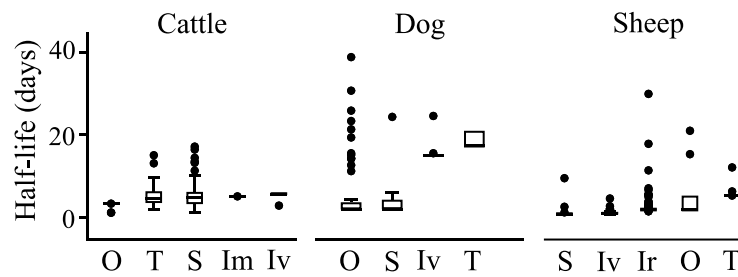

**d. C<sub>max</sub>: Host x Drug**

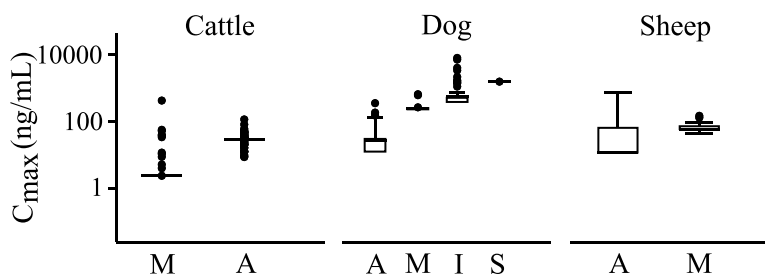

**e. C<sub>max</sub>: Host x Route**

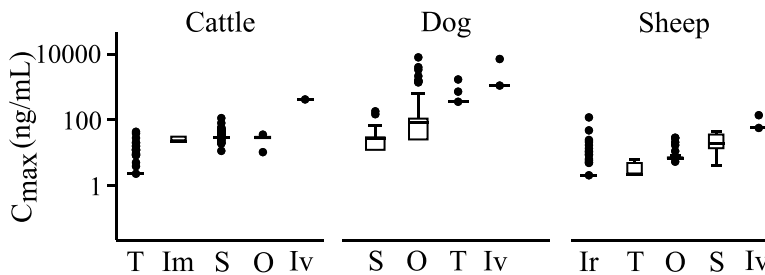

404

405 **Fig. 2.** Half-life and C<sub>max</sub> are dependent on interactions between drug class, host, and route of  
 406 administration. (a) Half-life is affected by the interaction between route of administration and

407 drug class. **(b)** The three most studied hosts show the effect of host and drug class on drug  
 408 half-life. **(c)** The interaction between drug application route and host affects the drug half-  
 409 life. **(d)**  $C_{max}$  is affected by the interaction between host and drug. **(e)** The interaction between  
 410 route of administration and host also impacts  $C_{max}$ . Abbreviations: Drug classes: A=  
 411 Avermectin, I = Isoxazoline, M=Milbemycin, S= Spinosyn; Routes: Im = Intramuscular, Ir =  
 412 Intraruminal, Iv = Intravenous, O = Oral, S = Subcutaneous, T = Topical.

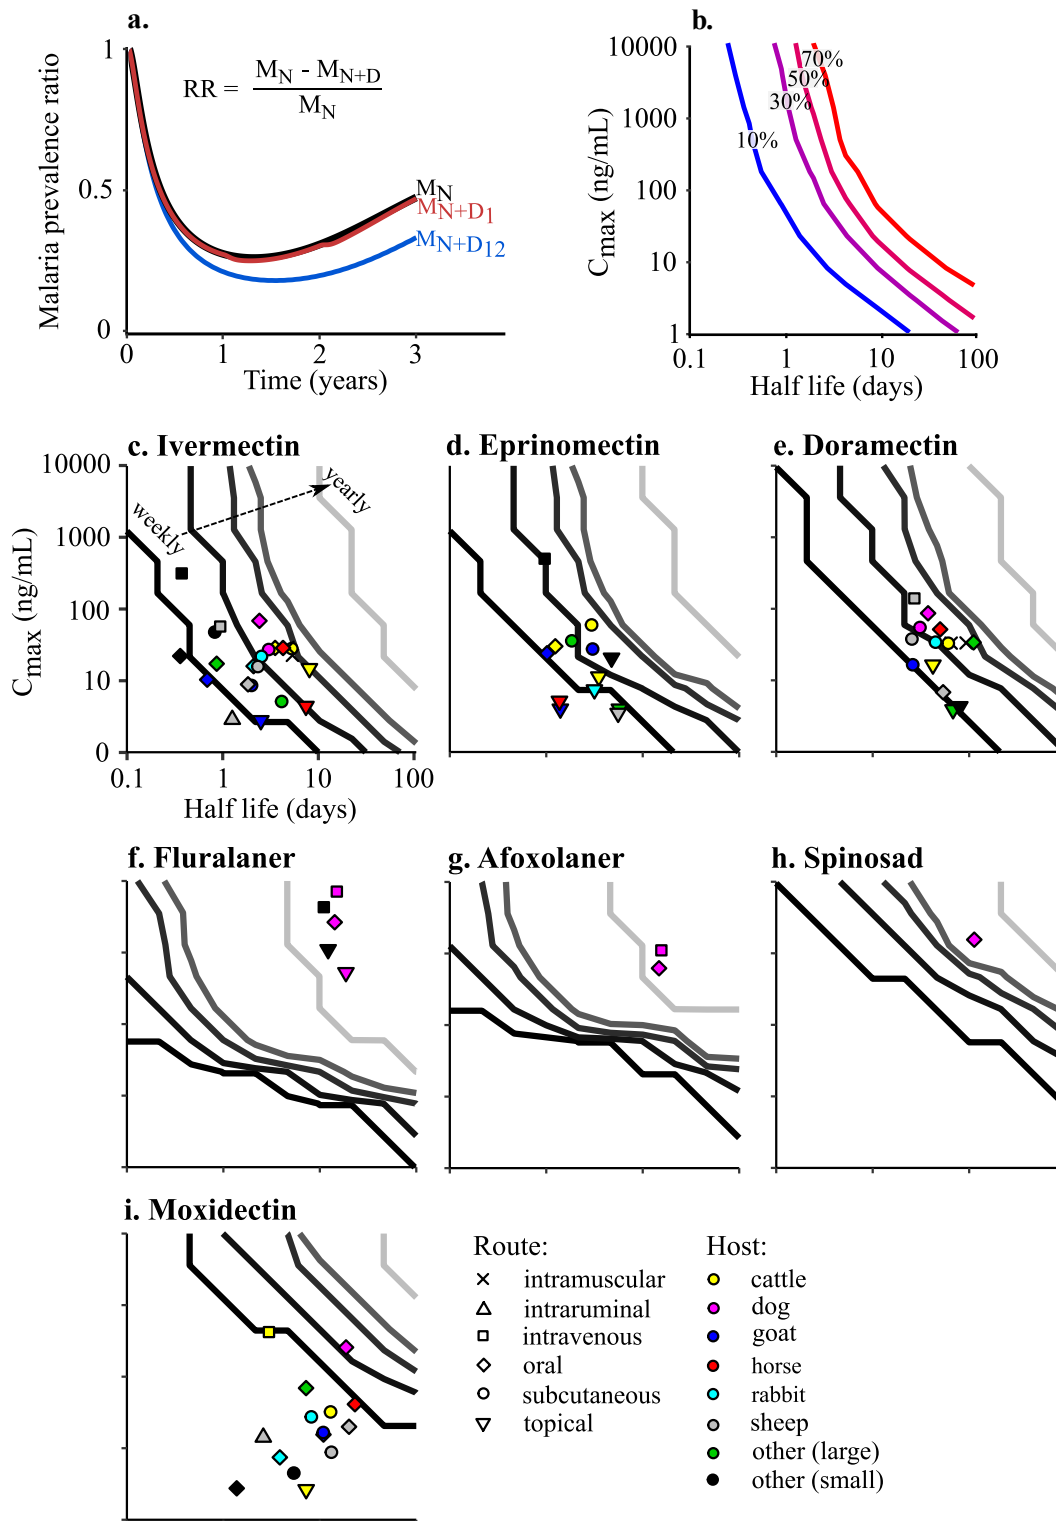

414 **Fig. 3.** Modelling malaria transmission and control methods. **(a)** The malaria prevalence ratio  
415 is compared for a population using LLINs alone ( $M_N$ , black), LLINs with livestock treated  
416 yearly with systemic insecticide ( $M_{N+D1}$ , red), and LLINs with livestock treated monthly with  
417 systemic insecticide ( $M_{N+D12}$ , blue). **(b)** For a strategy using LLINs and livestock treated at a  
418 set dosing frequency (here, monthly), the relative reduction in malaria prevalence can be  
419 calculated for insecticides of various half-lives and  $C_{max}$ s. **(c-i)** The dosing frequency  
420 necessary to achieve a 10% relative reduction in malaria prevalence can be calculated for  
421 insecticides with different pharmacokinetic properties. Overlaying pharmacokinetic values  
422 gathered from the review predicts the minimum dosing frequency of existing systemic  
423 insecticides in certain host-route scenarios. Contour definitions from left to right: weekly,  
424 monthly, quarter-annually, bi-annually, annually. Here, we assume indiscriminate biting  
425 behaviour ( $p_h = 0.5$ ) and a mesoendemic environment ( $m=10$ ).

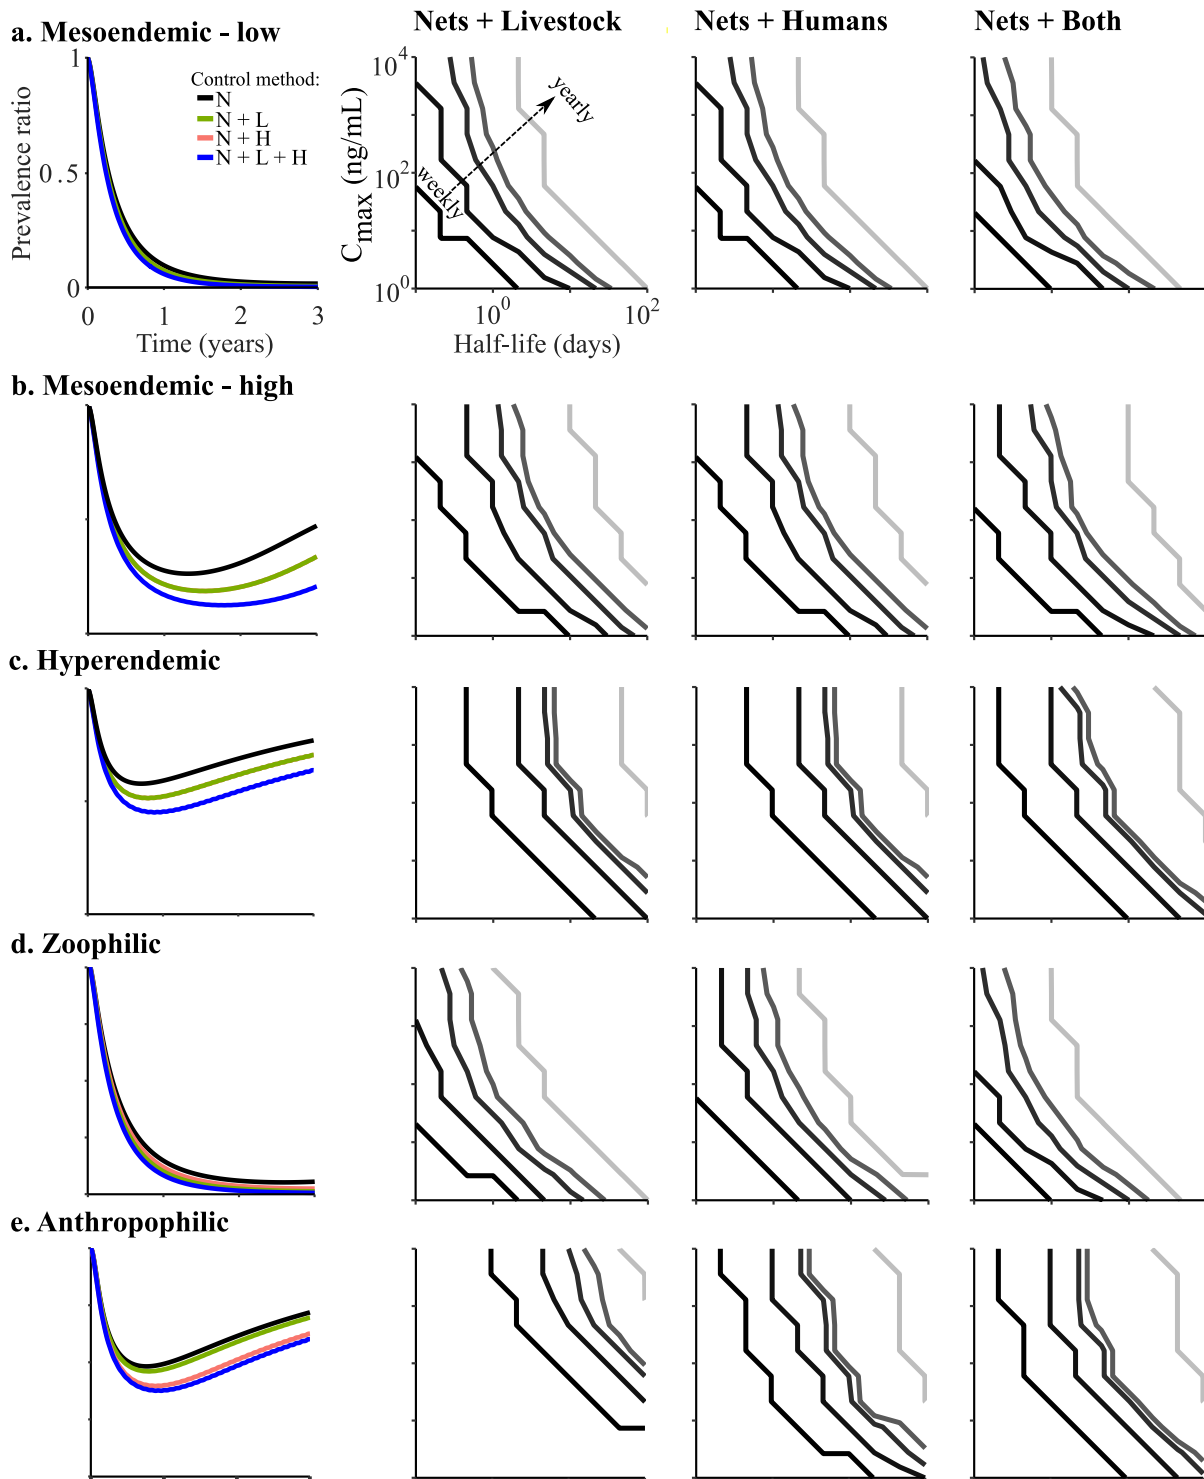

426

427 **Fig. 4.** Effect of different coverage strategies for scenarios with different malaria prevalence  
 428 classes and mosquito biting behaviours. The first column compares temporal dynamics of  
 429 malaria prevalence for the different scenarios: LLINs alone (N), LLINs and livestock  
 430 treatment (N+L), LLINs and human treatment (N+H), LLINs with both hosts treated (N +  
 431 both). The three right columns are the predictions for dosing frequency necessary to reduce  
 432 malaria prevalence by 10% for each scenario. (a-c) With increasing malaria presence, the  
 433 degree to which control methods can reduce malaria prevalence decreases and the frequency  
 434 of insecticide reapplication increases (mesoendemic-low:  $m = 5$ ; mesoendemic-high:  $m = 10$ ;  
 435 hyperendemic:  $m = 20$ ). Here, an indiscriminate biting behaviour is assumed in mosquitoes ( $p_H$

436 = 0.5), thus N+L and N+H have same outcome. **(d-e)** When mosquitoes are zoophilic ( $p_H =$   
437 0.35), systemic insecticides do not need to be dosed in livestock or humans as frequently as in  
438 other scenarios, due to lower rates of mosquitoes biting humans. Controlling anthropophilic  
439 mosquitoes ( $p_H = 0.8$ ) requires an increase in dosing frequency due to the high rate of human  
440 bites. Here,  $m = 10$ . Contour definitions from left to right: weekly, monthly, quarter-annually,  
441 bi-annually, annually.



442 **Table 1.** Range of pharmacokinetic and pharmacodynamic parameters collected from the  
443 literature review.

|                      | C <sub>max</sub> (ng/mL) | Half-life (day <sup>-1</sup> ) | F <sub>50</sub> (ng/mL) | LC <sub>50</sub> [T <sub>D</sub> ] (ng/mL) |
|----------------------|--------------------------|--------------------------------|-------------------------|--------------------------------------------|
| Macrocyclic lactones |                          |                                |                         |                                            |
| Doramectin           | 3.8 : 139.8              | 2.5 : 11.1                     | 9.2                     | 30.6                                       |
| Eprinomectin         | 3.4 : 503.0              | 1.0 : 5.7                      | 1.0                     | 7.6                                        |
| Ivermectin           | 2.7 : 316.0              | 0.4 : 7.8                      | 4.1                     | 7.3                                        |
| Moxidectin           | 2.6 : 420.0              | 1.4 : 23.1                     | 478.4                   | 1178.0                                     |
| Isoxazolines         |                          |                                |                         |                                            |
| Afoxolaner           | 621.9 : 1107.0           | 14.8 : 15.6                    | 0 *                     | 66.8                                       |
| Fluralaner           | 513.3 : 7109.0           | 11.0 : 18.6                    | 0 *                     | 21.2                                       |
| Spinosyns            |                          |                                |                         |                                            |
| Spinosad             | 1550.0                   | 11.3                           | 0 *                     | 461.0                                      |

444 \* F<sub>50</sub> remains to be measured for *Anopheles*

445 **References**

- 446 1. Bhatt S, et al. (2015) The effect of malaria control on *Plasmodium falciparum* in  
447 Africa between 2000 and 2015. *Nature* 526(7572):207–211.
- 448 2. Lengeler C (2004) Insecticide-treated bed nets and curtains for preventing malaria.  
449 *Cochrane Database Syst Rev* (2). doi:10.1002/14651858.CD000363.pub2.
- 450 3. WHO (2016) *World malaria report 2016* Available at:  
451 <https://www.who.int/malaria/publications/world-malaria-report-2016/report/en/>  
452 [Accessed January 26, 2018].
- 453 4. Knox TB, et al. (2014) An online tool for mapping insecticide resistance in major  
454 *Anopheles* vectors of human malaria parasites and review of resistance status for the  
455 Afrotropical region. *Parasites and Vectors* 7(1). doi:10.1186/1756-3305-7-76.
- 456 5. Ranson H, et al. (2011) Pyrethroid resistance in African anopheline mosquitoes: What  
457 are the implications for malaria control? *Trends Parasitol* 27(2):91–98.
- 458 6. Russell TL, et al. (2011) Increased proportions of outdoor feeding among residual  
459 malaria vector populations following increased use of insecticide-treated nets in rural  
460 Tanzania. *Malar J* 10. doi:10.1186/1475-2875-10-80.
- 461 7. Massebo F, Balkew M, Gebre-Michael T, Lindtjørn B (2015) Zoophagic behaviour of  
462 anopheline mosquitoes in southwest Ethiopia: Opportunity for malaria vector control.  
463 *Parasites and Vectors* 8(1):1–9.
- 464 8. Kiware SS, et al. (2012) Simplified models of vector control impact upon malaria  
465 transmission by zoophagic mosquitoes. *PLoS One* 7(5):e37661.
- 466 9. The malERA Consultative Group on Vector Control (2011) A research agenda for  
467 malaria eradication: Vector control. *PLoS Med* 8(1):e1000401.
- 468 10. Chaccour CJ, Rabinovich NR (2017) Oral, Slow-Release Ivermectin: Biting Back at  
469 Malaria Vectors. *Trends Parasitol* 33(3):156–158.
- 470 11. Field LM, Emyr Davies TG, O’Reilly AO, Williamson MS, Wallace BA (2017)  
471 Voltage-gated sodium channels as targets for pyrethroid insecticides. *Eur Biophys J*  
472 46(7):675–679.
- 473 12. Shoop WL, Mrozik H, Fisher MH (1995) Structure and activity of avermectins and  
474 milbemycins in animal health. *Vet Parasitol* 59(2):139–156.
- 475 13. Simon-Delso N, et al. (2015) Systemic insecticides (Neonicotinoids and fipronil):  
476 Trends, uses, mode of action and metabolites. *Environ Sci Pollut Res* 22(1):5–34.
- 477 14. Bacci L, Lupi D, Savoldelli S, Rossaro B (2016) A review of Spinosyns, a derivative  
478 of biological acting substances as a class of insecticides with a broad range of action  
479 against many insect pests. *J Entomol Acarol Res* 48(1):40.
- 480 15. Gassel M, Wolf C, Noack S, Williams H, Ilg T (2014) The novel isoxazoline  
481 ectoparasiticide fluralaner: Selective inhibition of arthropod  $\gamma$ -aminobutyric acid- and  
482 l-glutamate-gated chloride channels and insecticidal/acaricidal activity. *Insect Biochem*  
483 *Mol Biol* 45:111–124.
- 484 16. Robertson-Plouch C, et al. (2008) Clinical field study of the safety and efficacy of  
485 spinosad chewable tablets for controlling fleas on dogs. *Vet Ther* 9(1):26–36.

- 486 17. Shoop WL, et al. (2014) Discovery and mode of action of afoxolaner, a new  
487 isoxazoline parasiticide for dogs. *Vet Parasitol* 201(3–4):179–189.
- 488 18. McKellar QA, Benchaoui HA (1996) Avermectins and milbemycins. *J Vet Pharmacol*  
489 *Ther* 19(5):331–351.
- 490 19. Cupp EW, Sauerbrey M, Richards F (2011) Elimination of human onchocerciasis:  
491 History of progress and current feasibility using ivermectin (Mectizan®) monotherapy.  
492 *Acta Trop* 120:S100–S108.
- 493 20. Alout H, et al. (2014) Evaluation of ivermectin mass drug administration for malaria  
494 transmission control across different West African environments. *Malar J* 13(1).  
495 doi:10.1186/1475-2875-13-417.
- 496 21. Pooda HS, et al. (2015) Administration of ivermectin to peridomestic cattle: A  
497 promising approach to target the residual transmission of human malaria. *Malar J*  
498 14(1):496.
- 499 22. Chaccour C, Hammann F, Regina Rabinovich N, Rabinovich NR (2017) Ivermectin to  
500 reduce malaria transmission I. Pharmacokinetic and pharmacodynamic considerations  
501 regarding efficacy and safety. *Malar J* 16. doi:10.1186/s12936-017-1801-4.
- 502 23. WHO (2017) *WHO preferred product characteristics: endectocide for malaria*  
503 *transmission control* Available at:  
504 [http://apps.who.int/iris/bitstream/10665/255694/1/WHO-HTM-GMP-2017.10-](http://apps.who.int/iris/bitstream/10665/255694/1/WHO-HTM-GMP-2017.10-eng.pdf?ua=1)  
505 [eng.pdf?ua=1](http://apps.who.int/iris/bitstream/10665/255694/1/WHO-HTM-GMP-2017.10-eng.pdf?ua=1) [Accessed November 3, 2017].
- 506 24. Mandal S, Sarkar RR, Sinha S (2011) Mathematical models of malaria - a review.  
507 *Malar J* 10:202.
- 508 25. Yakob L, Cameron M, Lines J (2017) Combining indoor and outdoor methods for  
509 controlling malaria vectors: An ecological model of endectocide-treated livestock and  
510 insecticidal bed nets. *Malar J* 16(1). doi:10.1186/s12936-017-1748-5.
- 511 26. White MT, et al. (2011) Modelling the impact of vector control interventions on  
512 *Anopheles gambiae* population dynamics. *Parasit Vectors* 4(1):153.
- 513 27. Miglianico M, et al. (2018) Repurposing isoxazoline veterinary drugs for control of  
514 vector-borne human diseases. (14):1–7.
- 515 28. Fritz ML, Walker ED, Miller JR (2012) Lethal and Sublethal Effects of  
516 Avermectin/Milbemycin Parasiticides on the African Malaria Vector, *Anopheles*  
517 *arabiensis*. *J Med Entomol* 49(2):326–331.
- 518 29. Butters MP, et al. (2012) Comparative evaluation of systemic drugs for their effects  
519 against *Anopheles gambiae*. *Acta Trop* 121(1):34–43.
- 520 30. Omondi S, et al. (2017) Quantifying the intensity of permethrin insecticide resistance  
521 in *Anopheles* mosquitoes in western Kenya. *Parasites and Vectors* 10(1).  
522 doi:10.1186/s13071-017-2489-6.
- 523 31. Owusu HF, Chitnis N, Müller P (2017) Insecticide susceptibility of *Anopheles*  
524 mosquitoes changes in response to variations in the larval environment. *Sci Rep* 7(1).  
525 doi:10.1038/s41598-017-03918-z.
- 526 32. WHO (2009) *Report of the Thirteenth Whopes Working Group Meeting* Available at:

- 527 [http://apps.who.int/iris/bitstream/handle/10665/44212/9789241598712\\_eng.pdf?sequence=1](http://apps.who.int/iris/bitstream/handle/10665/44212/9789241598712_eng.pdf?sequence=1) [Accessed August 9, 2018].  
528
- 529 33. Dhillon S, Gill K (2006) Basic pharmacokinetics. *Clinical Pharmacokinetics*, pp 1–44.
- 530 34. Gokbulut C, Cirak VY, Senlik B, Aksit D, McKellar QA (2011) The effects of  
531 different ages and dosages on the plasma disposition and hair concentration profile of  
532 ivermectin following pour-on administration in goats. *J Vet Pharmacol Ther* 34(1):70–  
533 75.
- 534 35. Gokbulut C, et al. (2009) Sex-related plasma disposition of ivermectin following pour-  
535 on administration in goats. *Vet Parasitol* 162(3–4):342–345.
- 536 36. Gokbulut C, et al. (2009) Breed-related plasma disposition of ivermectin following  
537 subcutaneous administration in Kilis and Damascus goats. *Res Vet Sci* 87(3):445–448.
- 538 37. Toutain CE, Seewald W, Jung M (2017) The intravenous and oral pharmacokinetics of  
539 lotilaner in dogs. *Parasit Vectors* 10(1):522.
- 540 38. Perez R, et al. (2007) Gastrointestinal parasitism reduces the plasma availability of  
541 doramectin in lambs. *Vet J* 173(1):167–173.
- 542 39. Perez R, Palma C, Nunez MJ, Cox J (2008) Pharmacokinetics of ivermectin after  
543 maternal or fetal intravenous administration in sheep. *J Vet Pharmacol Ther*  
544 31(5):406–414.
- 545 40. Sallovitz JM, et al. (2005) Doramectin concentration profiles in the gastrointestinal  
546 tract of topically-treated calves: Influence of animal licking restriction. *Vet Parasitol*  
547 133(1):61–70.
- 548 41. Zhang D, et al. (2015) Anthelmintic efficacy, plasma and milk kinetics of  
549 eprinomectin following topical and subcutaneous administration to yaks (*Bos*  
550 *grunniens*). *Exp Parasitol* 153:17–21.
- 551 42. Snow RW, Guerra CA, Noor AM, Myint HY, Hay SI (2005) The global distribution of  
552 clinical episodes of *Plasmodium falciparum* malaria. *Nature* 434(7030):214–217.
- 553 43. Yakob L (2016) How do biting disease vectors behaviourally respond to host  
554 availability? doi:10.1186/s13071-016-1762-4.
- 555 44. Chaccour CJ, et al. (2013) Ivermectin to reduce malaria transmission: A research  
556 agenda for a promising new tool for elimination. *Malar J* 12(1). doi:10.1186/1475-  
557 2875-12-153.
- 558 45. Alout H, Foy BD (2017) Ivermectin: a complimentary weapon against the spread of  
559 malaria? *Expert Rev Anti Infect Ther* 15(3):231–240.
- 560 46. Foy BD, Kobylinski KC, Silva IM, Rasgon JL, Sylla M (2011) Endectocides for  
561 malaria control. *Trends Parasitol* 27. doi:10.1016/j.pt.2011.05.007.
- 562 47. Smit MR, et al. (2018) Safety and mosquitocidal efficacy of high-dose ivermectin  
563 when co-administered with dihydroartemisinin-piperazine in Kenyan adults with  
564 uncomplicated malaria (IVERMAL): a randomised, double-blind, placebo-controlled  
565 trial. *Lancet Infect Dis* 18(6):615–626.
- 566 48. Bassissi MF, Alvinerie M, Lespine A (2004) Macrocyclic lactones: distribution in  
567 plasma lipoproteins of several animal species including humans. *Comp Biochem*

- 568            *Physiol C Toxicol Pharmacol* 138(4):437–444.
- 569    49.    Lifschitz A, et al. (1999) Ivermectin disposition kinetics after subcutaneous and  
570            intramuscular administration of an oil-based formulation to cattle. *Vet Parasitol*  
571            86(3):203–215.
- 572    50.    Bartley DJ, et al. (2012) Influence of Pluronic 85 and ketoconazole on disposition and  
573            efficacy of ivermectin in sheep infected with a multiple resistant *Haemonchus*  
574            *contortus* isolate. *Vet Parasitol* 187(3–4):464–472.
- 575    51.    Chaccour CJ, et al. (2017) Cytochrome P450/ABC transporter inhibition  
576            simultaneously enhances ivermectin pharmacokinetics in the mammal host and  
577            pharmacodynamics in *Anopheles gambiae*. *Sci Rep* 7(1):8535.
- 578    52.    Dupuy J, Larrieu G, Sutra JF, Lespine A, Alvinerie M (2003) Enhancement of  
579            moxidectin bioavailability in lamb by a natural flavonoid: quercetin. *Vet Parasitol*  
580            112(4):337–347.
- 581    53.    Molento MB, Lifschitz A, Sallovitz J, Lanusse C, Prichard R (2004) Influence of  
582            verapamil on the pharmacokinetics of the antiparasitic drugs ivermectin and  
583            moxidectin in sheep. *Parasitol Res* 92(2):121–127.
- 584    54.    Ballent M, Lifschitz A, Virkel G, Sallovitz J, Lanusse C (2007) Involvement of P-  
585            glycoprotein on ivermectin kinetic behaviour in sheep: itraconazole-mediated changes  
586            on gastrointestinal disposition. *J Vet Pharmacol Ther* 30(3):242–248.
- 587    55.    Chaccour CJ, et al. (2018) Targeting cattle for malaria elimination: Marked reduction  
588            of *Anopheles arabiensis* survival for over six months using a slow-release ivermectin  
589            implant formulation. *Parasites and Vectors* 11(1). doi:10.1186/s13071-018-2872-y.
- 590    56.    Hemingway J, Hawkes NJ, Mccarroll L, Ranson H (2004) The molecular basis of  
591            insecticide resistance in mosquitoes. *Insect Biochem Mol Biol* 34:653–665.
- 592    57.    Pohl PC, et al. (2011) ABC transporter efflux pumps: A defense mechanism against  
593            ivermectin in *Rhipicephalus* (*Boophilus*) *microplus*. *Int J Parasitol* 41(13–14):1323–  
594            1333.
- 595    58.    Luo L, Sun YJ, Wu YJ (2013) Abamectin resistance in *Drosophila* is related to  
596            increased expression of P-glycoprotein via the dEGFR and dAkt pathways. *Insect*  
597            *Biochem Mol Biol* 43(8):627–634.
- 598    59.    Yoon KS, et al. (2011) Brief exposures of human body lice to sub-lethal amounts of  
599            ivermectin over transcribes detoxification genes involved in tolerance. *Insect Mol Biol*  
600            20(6):287–699.
- 601    60.    Alegr MA, et al. (2015) Use of Ivermectin as Endoparasiticide in Tropical Cattle  
602            Herds Generates Resistance in Gastrointestinal Nematodes and the Tick *Rhipicephalus*  
603            *microplus* (Acari: Ixodidae). *J Med Entomol* 52(2):214–221.
- 604    61.    Osei-Atweneboana MY, et al. (2011) Phenotypic Evidence of Emerging Ivermectin  
605            Resistance in *Onchocerca volvulus*. *PLoS Negl Trop Dis* 5(3):e998.
- 606    62.    Alvinerie M, Sutra JF, Galtier P, Mage C (1999) Pharmacokinetics of eprinomectin in  
607            plasma and milk following topical administration to lactating dairy cattle. *Res Vet Sci*  
608            67(3):229–232.

- 609 63. Center for Drug Evaluation and Research (1996) *Center for Drug Evaluation and*  
610 *Research Approval Package for Ivermectin* Available at:  
611 [https://www.accessdata.fda.gov/drugsatfda\\_docs/nda/96/050742ap.pdf](https://www.accessdata.fda.gov/drugsatfda_docs/nda/96/050742ap.pdf) [Accessed  
612 January 3, 2018].
- 613 64. WHO (2006) *Preventive chemotherapy in human helminthiasis. Coordinated use of*  
614 *anthelmintic drugs in control interventions. A manual for health professionals and*  
615 *programme managers*. Available at:  
616 [http://apps.who.int/iris/bitstream/handle/10665/43545/9241547103\\_eng.pdf;jsessionid](http://apps.who.int/iris/bitstream/handle/10665/43545/9241547103_eng.pdf;jsessionid=9890337B95A749561EF97455D25FFB88?sequence=1)  
617 [=9890337B95A749561EF97455D25FFB88?sequence=1](http://apps.who.int/iris/bitstream/handle/10665/43545/9241547103_eng.pdf;jsessionid=9890337B95A749561EF97455D25FFB88?sequence=1) [Accessed May 25, 2018].
- 618 65. Anastasio A, et al. (2002) Residue study of ivermectin in plasma, milk, and mozzarella  
619 cheese following subcutaneous administration to buffalo (*Bubalus bubalis*). *J Agric*  
620 *Food Chem* 50(18):5241–5245.
- 621 66. Chicoine AL, Durden DA, MacNaughton G, Dowling PM (2007) Ivermectin use and  
622 resulting milk residues on 4 Canadian dairy herds. *Can Vet J* 48(8):836–838.
- 623 67. Imperiale F, Lifschitz A, Sallovitz J, Virkel G, Lanusse C (2004) Comparative  
624 depletion of ivermectin and moxidectin milk residues in dairy sheep after oral and  
625 subcutaneous administration. *J Dairy Res* 71(4):427–433.
- 626 68. Steel JW (1993) Pharmacokinetics and metabolism of avermectins in livestock. *Vet*  
627 *Parasitol* 48(1–4):45–57.
- 628  
629
